# Supplementary material
Source: Springer Nature journal article supplement (https://www.springermedizin.de/resource/supplementary/13075_2013_4176_MOESM14_ESM.pdf/9696268)

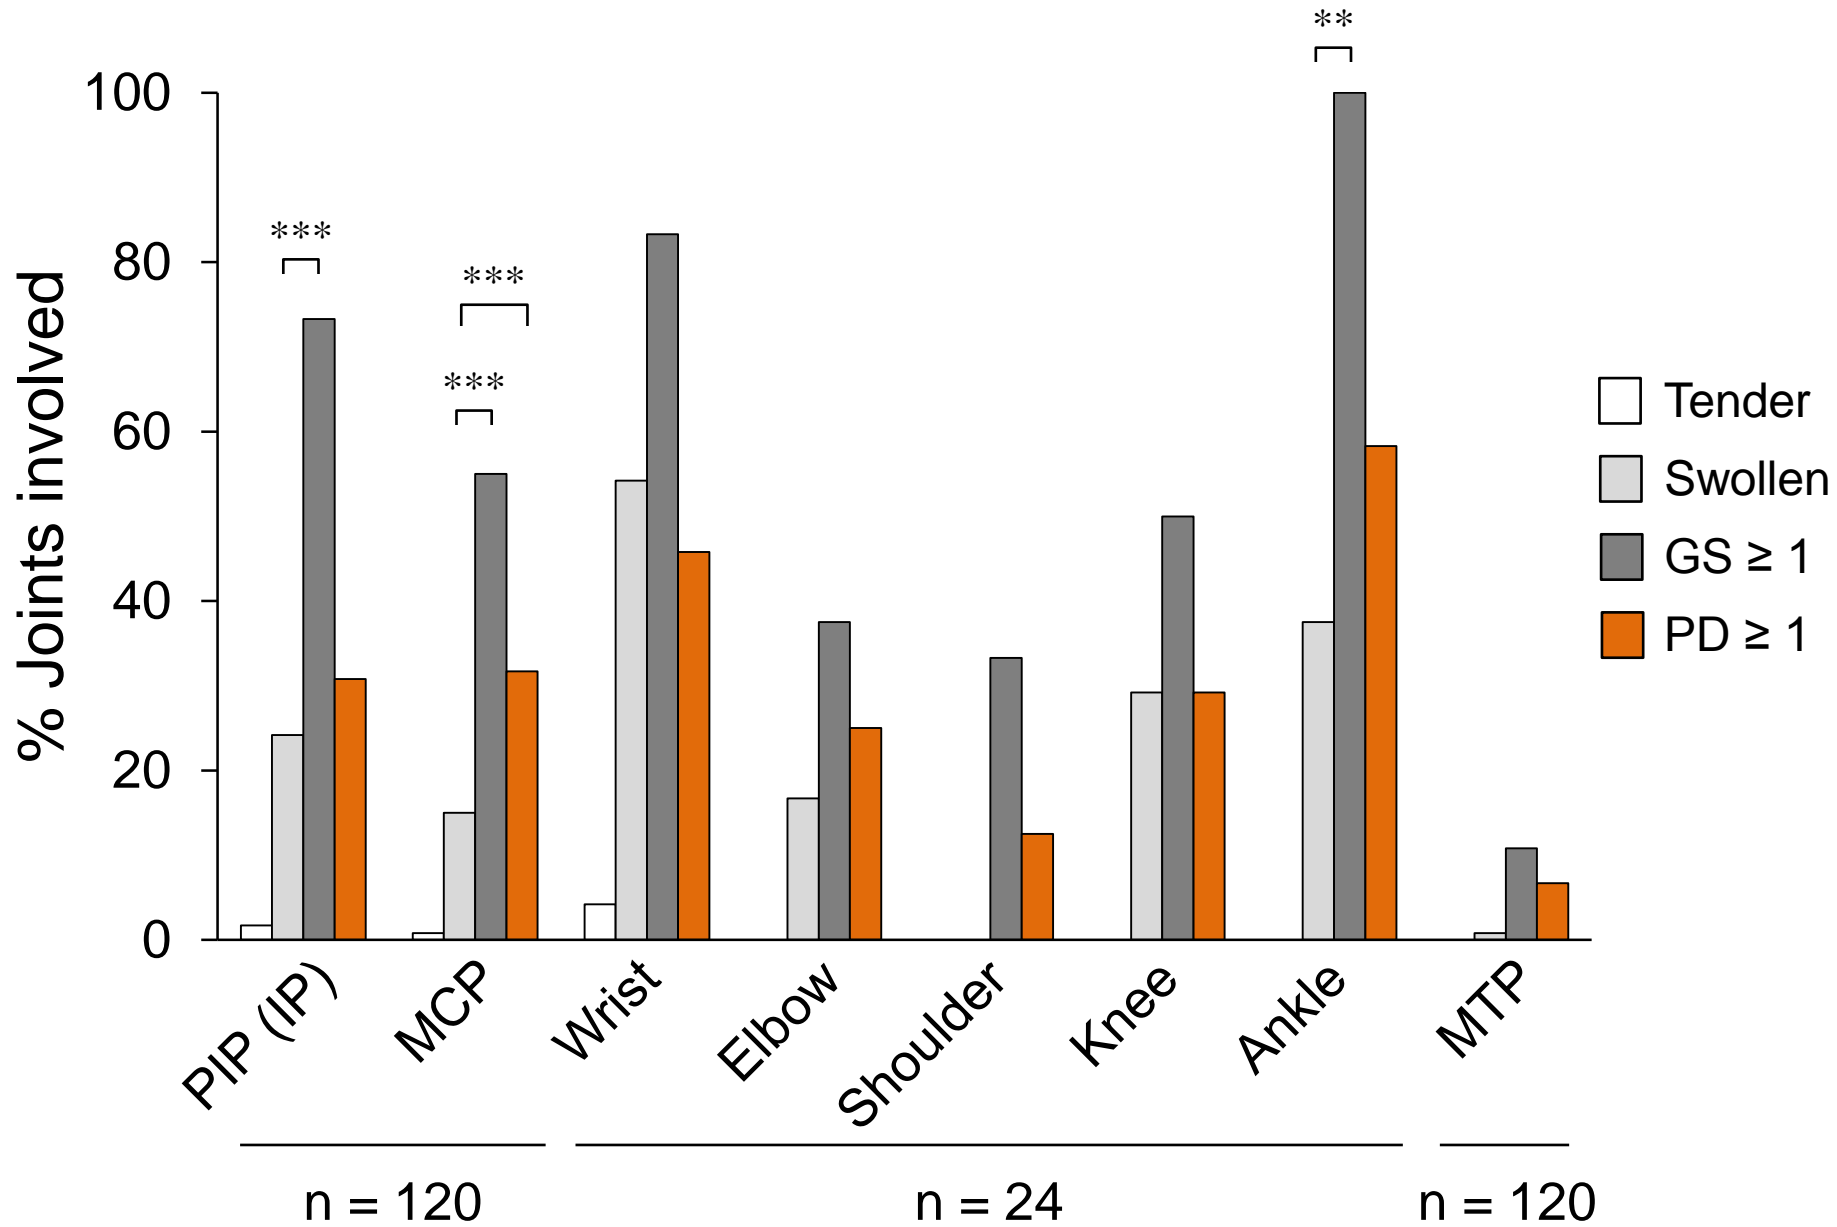

Supplement: MOESM14 [file 9696268]
